# Supplementary material
Source: publisher site journal article supplement (http://kjim.org/upload/media/kjim-2021-088-suppl4.pdf)
Supplement: Supplementary file 1 [file kjim-2021-088-suppl4.pdf]

**Supplementary Table 4. Baseline characteristics of patients before and after reimbursement**

| Variable                           | Pre-reimbursement period <sup>a</sup><br>(n = 23) | Post-reimbursement period <sup>a</sup><br>(n = 27) | p value |
|------------------------------------|---------------------------------------------------|----------------------------------------------------|---------|
| <b>Clinical</b>                    |                                                   |                                                    |         |
| Age, yr                            | 71.0 (64.0–77.0)                                  | 63.0 (54.0–72.0)                                   | 0.036   |
| Male sex                           | 22.9 (21.2–24.4)                                  | 23.6 (21.7–24.8)                                   | 0.750   |
| Body mass index, kg/m <sup>2</sup> | 1.7 (1.6–1.9)                                     | 1.7 (1.6–1.9)                                      | 0.480   |
| Body surface area, m <sup>2</sup>  | 1.6 ± 0.1                                         | 1.7 ± 0.1                                          | 0.397   |
| Severe diabetes mellitus           | 9 (39.1)                                          | 6 (22.2)                                           | 0.193   |
| Chronic renal disease              | 9 (39.1)                                          | 13 (48.1)                                          | 0.662   |
| Prior cardiac surgery              | 10 (43.4)                                         | 6 (22.2)                                           | 0.108   |
| Ischemic heart disease             | 14 (60.8)                                         | 14 (51.8)                                          | 0.522   |
| <b>INTERMACS profile</b>           |                                                   |                                                    |         |
| Critical cardiogenic shock         | 2 (8.6)                                           | 0                                                  | 0.207   |
| Progressive decline                | 7 (30.4)                                          | 8 (29.6)                                           | 0.951   |
| Stable but inotrope-dependent      | 14 (60.8)                                         | 16 (59.2)                                          | 0.908   |
| Resting symptoms                   | 0                                                 | 3 (11.1)                                           | 0.240   |
| LV ejection fraction               | 22.5 (19.7–27.0)                                  | 22.5 (15.0–26.0)                                   | 0.225   |
| > 50%                              | 0                                                 | 0                                                  | -       |
| 40%–49%                            | 0                                                 | 0                                                  | -       |
| 30%–39%                            | 4 (17.3)                                          | 3 (11.1)                                           | 0.689   |
| 20%–29%                            | 12 (52.1)                                         | 13 (48.1)                                          | 0.777   |
| < 20%                              | 7 (30.4)                                          | 11 (40.7)                                          | 0.449   |
| LV end-diastolic diameter, cm      | 6.9 (5.9–7.7)                                     | 6.6 (6.3–7.4)                                      | 0.368   |
| <b>NYHA class</b>                  |                                                   |                                                    |         |
| III                                | 6 (26.0)                                          | 1 (3.7)                                            | 0.039   |
| IV                                 | 17 (73.9)                                         | 26 (96.2)                                          | 0.039   |
| <b>Laboratory</b>                  |                                                   |                                                    |         |
| Hemoglobin, g/dL                   | 10.1 (9.4–11.9)                                   | 11.8 (9.2–13.3)                                    | 0.164   |
| White blood cell count, × 1,000/μL | 6.8 (5.2–8.7)                                     | 7.8 (6.4–8.9)                                      | 0.754   |
| Platelets, × 1,000/μL              | 119.0 (93.0–197.0)                                | 160.0 (90.0–229.0)                                 | 0.373   |
| Blood urea nitrogen, mg/dL         | 29.3 (17.3–53.4)                                  | 17.7 (15.2–30.1)                                   | 0.075   |
| Creatinine, mg/dL                  | 1.4 (0.9–2.0)                                     | 1.2 (0.9–1.6)                                      | 0.496   |
| Albumin, g/dL                      | 3.4 (2.9–3.9)                                     | 3.6 (3.3–4.0)                                      | 0.221   |
| ALT, μ/L                           | 21.0 (16.0–48.0)                                  | 28.0 (17.0–90.0)                                   | 0.447   |
| AST, μ/L                           | 28.0 (24.0–61.0)                                  | 30.0 (21.0–62.0)                                   | 0.838   |
| Total bilirubin, mg/dL             | 1.4 (0.9–2.8)                                     | 1.5 (0.8–2.2)                                      | 0.612   |
| INR                                | 1.3 (1.2–1.4)                                     | 1.2 (1.0–1.4)                                      | 0.087   |
| Sodium, mmol/L                     | 135.0 (132.0–138.0)                               | 134.0 (130.0–138.0)                                | 0.317   |
| hsCRP, mg/L                        | 30.6 (3.5–49.3)                                   | 11.7 (3.1–22.3)                                    | 0.216   |
| NT-proBNP, pg/mL                   | 9,314 (4,681–22,066)                              | 8,435 (5,358–14,769)                               | 0.540   |
| <b>Preoperative</b>                |                                                   |                                                    |         |
| ECMO bridged                       | 7 (30.4)                                          | 4 (14.8)                                           | 0.184   |

**Supplementary Table 4. Continued**

| Variable                     | Pre-reimbursement period <sup>a</sup><br>(n = 23) | Post-reimbursement period <sup>a</sup><br>(n = 27) | p value |
|------------------------------|---------------------------------------------------|----------------------------------------------------|---------|
| Dialysis                     | 7 (30.4)                                          | 8 (29.6)                                           | 0.951   |
| IABP                         | 1 (4.3)                                           | 0                                                  | 0.460   |
| Ventilator                   | 7 (30.4)                                          | 8 (29.6)                                           | 0.951   |
| <b>Hemodynamic</b>           |                                                   |                                                    |         |
| Mean RA pressure, mmHg       | 14.0 (4.5–15.5)                                   | 11.5 (8.0–16.0)                                    | 0.513   |
| Mean PA pressure, mmHg       | 34.0 (29.0–41.0)                                  | 40.5 (32.0–43.8)                                   | 0.111   |
| Mean PWP, mmHg               | 24.0 (17.0–28.5)                                  | 28.5 (23.3–32.5)                                   | 0.042   |
| Cardiac output, L/min        | 3.4 (2.9–4.3)                                     | 3.0 (2.5–3.6)                                      | 0.189   |
| <b>Medications</b>           |                                                   |                                                    |         |
| ARB or ARNI                  | 14 (60.8)                                         | 18 (66.6)                                          | 0.670   |
| ACE inhibitor                | 7 (30.4)                                          | 9 (33.3)                                           | 0.827   |
| Amiodarone                   | 12 (52.1)                                         | 17 (62.9)                                          | 0.441   |
| Beta blocker                 | 12 (52.1)                                         | 15 (55.5)                                          | 0.811   |
| Aldosterone antagonist       | 22 (95.6)                                         | 26 (96.2)                                          | 1.000   |
| Ivabradine                   | 0                                                 | 12 (44.4)                                          | 0.000   |
| Loop diuretics               | 22 (95.6)                                         | 27 (100)                                           | 0.460   |
| Phosphodiesterase inhibitors | 11 (47.8)                                         | 12 (44.4)                                          | 0.811   |
| ICD                          | 8 (34.7)                                          | 5 (18.5)                                           | 0.191   |
| CRT                          | 2 (8.6)                                           | 7 (25.9)                                           | 0.152   |
| <b>Implant strategy</b>      |                                                   |                                                    |         |
| BTT/BTC                      | 12 (52.2)                                         | 18 (66.7)                                          | 0.297   |
| DT                           | 11 (47.8)                                         | 9 (33.3)                                           | 0.297   |
| <b>Device type</b>           |                                                   |                                                    |         |
| Heartmate II™                | 6 (26.0)                                          | 11 (40.7)                                          | 0.276   |
| HVAD™                        | 17 (73.9)                                         | 16 (59.2)                                          | 0.276   |

Values are presented as median (interquartile range), mean  $\pm$  standard deviation, or number (%).

INTERMACS, Interagency Registry for Mechanically Assisted Circulatory Support; LV, left ventricle; NYHA, New York Heart Association; ALT, alanine aminotransferase; AST, aspartate aminotransferase; INR, international normalized ratio; hsCRP, high-sensitivity C-reactive protein; NT-proBNP, N-terminal-pro hormone B-type natriuretic peptide; ECMO, extracorporeal membrane oxygenation; IABP, intra-aortic balloon pump; RA, right atrium; PA, pulmonary artery; PWP, pulmonary wedge pressure; ARB, angiotensin II receptor blocker; ARNI, angiotensin receptor-neprilysin inhibitor; ACE, angiotensin-converting enzyme; ICD, implantable cardioverter-defibrillator; CRT, cardiac resynchronization therapy; BTT/BTC, bridge to transplantation/bridge to candidacy; DT, destination therapy; HVAD, HeartWare Ventricular Assist Device.

<sup>a</sup>The national insurance commenced reimbursement for pre-approved cases since October, 2018.
